# Supplementary material
Source: publisher site journal article supplement (https://www.dovepress.com/get_supplementary_file.php?f=372725.docx)
Supplement: Supplementary file 1 [file get_supplementary_file.php]

**Supplementary Table 1.** Knowledge about the microbiome, dysbiosis, and probiotics among healthcare workers, and their correct answers

| **Question** | **Correct answer** | | |
| --- | --- | --- | --- |
| **Microbiome** |  | | |
| 1. What is the microbiome? | All living microorganisms in the human body | | |
| 1. All microorganisms cause diseases in humans* | Incorrect | | |
| 1. There are microorganisms living naturally in the intestinal tract | Correct | | |
| 1. There are microorganisms living naturally in the respiratory tract | Correct | | |
| 1. There are microorganisms living naturally on the skin | Correct | | |
| 1. Microorganisms naturally living in body compartments play a major role in human health and disease pathogenesis | Correct | | |
| 1. There are microorganisms present in breast milk | Correct | | |
| 1. There are microorganism naturally present in some food we eat | Correct | | |
| 1. Mothers can transfer microorganisms to infants during pregnancy | Correct | | |
| 1. Mothers can vertically transmit microorganisms to their newborn during natural birth | Correct | | |
| 1. Mothers can transmit microorganisms to their infant during breast feeding | Correct | | |
| 1. Interactions occur between microorganisms living in different body compartments, such as between the intestinal and lung microbiomes | Correct | | |
| 1. The diversity among the microbial species of the microbiome varies between individuals and between various body compartments within the same individual | Correct | | |
| 1. Cleaning hands with antimicrobial soap is important to prevent all infections* | Incorrect | | |
| **Dysbiosis** |  |  |  |
| 1. What is dysbiosis? | Changes in the diversity and number of the microorganisms residing in the human body | | |
| 1. A strong link exists between microbes living in our body (microbiome) and the development of allergic diseases | Correct | | |
| 1. Changes (microbial dysbiosis) in the respiratory microbiome are associated with the development of bronchial asthma and allergic rhinitis | Correct | | |
| 1. Changes (microbial dysbiosis) in the gastrointestinal microbiome are associated with allergic conditions such as eczema and food allergy | Correct | | |
| 1. Early exposure to environmental flora and fauna can lower the risk of developing allergies | Correct | | |
| 1. Reduced antibiotic use during early infancy or during the perinatal period can lower the risk of dysbiosis development and future allergies and asthma in children | Correct | | |
| 1. Maternal cesarean section causes dysbiosis in the child and increases the risk for the development of allergic disorders during early life | Correct | | |
| 1. Microbial manipulation can reduce the risk of allergic immune responses | Correct | | |
| **Probiotics** |  |  |  |
| 1. What is the definition of a probiotic? | Probiotics are live microorganisms, that when administered in adequate amounts, confer health benefits to the host | | |
| 1. It is advisable to avoid consuming any supplement labeled as ‘’bacterial strains’’ or ‘’probiotics’’ because they may be harmful* | Incorrect | | |
| 1. Cultured dairy products, such as yogurt, buttermilk, and kefir, are sources of good bacteria | Correct | | |

*Negatively stated questions

**Supplementary Table 2.** Demographic and professional characteristics and related experience by individual knowledge of healthcare workers about microbiome, dysbiosis, and probiotics

|  | **Microbiome**  **knowledge score group** | | | **Dysbiosis**  **knowledge score group** | | | **Probiotics**  **knowledge score group** | | |
| --- | --- | --- | --- | --- | --- | --- | --- | --- | --- |
| **High** | **Low** |  | **> median** | **≤median** |  | **> median** | **≤median** |  |
| **Age group** |  |  |  |  |  |  |  |  |  |
| Mean ± SD (years) | 42.0±9.6 | 39.8±11.9 |  | 43.0±10.5 | 39.3±10.6 | * | 41.8±10.8 | 40.2±10.6 |  |
| <35 years old | 30 (25.6%) | 34 (39.5%) |  | 22 (22.4%) | 42 (40.0%) | * | 31 (26.7%) | 33 (37.9%) |  |
| 35-45 years old | 44 (37.6%) | 25 (29.1%) |  | 35 (35.7%) | 34 (32.4%) |  | 42 (36.2%) | 27 (31.0%) |  |
| >45 years old | 43 (36.8%) | 27 (31.4%) |  | 41 (41.8%) | 29 (27.6%) |  | 43 (37.1%) | 27 (31.0%) |  |
| **Gender** |  |  |  |  |  |  |  |  |  |
| Male | 43 (36.8%) | 35 (40.7%) |  | 39 (39.8%) | 39 (37.1%) |  | 42 (36.2%) | 36 (41.4%) |  |
| Female | 74 (63.2%) | 51 (59.3%) |  | 59 (60.2%) | 66 (62.9%) |  | 74 (63.8%) | 51 (58.6%) |  |
| **Specialty** |  |  |  |  |  |  |  |  |  |
| Pediatrics | 65 (55.6%) | 43 (50.0%) |  | 51 (52.0%) | 57 (54.3%) |  | 60 (51.7%) | 48 (55.2%) |  |
| Family Medicine | 52 (44.4%) | 43 (50.0%) |  | 47 (48.0%) | 48 (45.7%) |  | 56 (48.3%) | 39 (44.8%) |  |
| **Level of training** |  |  |  |  |  |  |  |  |  |
| Consultant | 68 (58.1%) | 41 (47.7%) |  | 60 (61.2%) | 49 (46.7%) |  | 66 (56.9%) | 43 (49.4%) |  |
| Specialist | 24 (20.5%) | 20 (23.3%) |  | 18 (18.4%) | 26 (24.8%) |  | 22 (19.0%) | 22 (25.3%) |  |
| Resident & others | 25 (21.4%) | 25 (29.1%) |  | 20 (20.4%) | 30 (28.6%) |  | 28 (24.1%) | 22 (25.3%) |  |
| **Prescribe probiotic food or drinks for most of patients** |  |  |  |  |  |  |  |  |  |
| No | 36 (30.8%) | 37 (43.0%) |  | 19 (19.4%) | 54 (51.4%) | * | 28 (24.1%) | 45 (51.7%) | * |
| Yes | 81 (69.2%) | 49 (57.0%) |  | 79 (80.6%) | 51 (48.6%) |  | 88 (75.9%) | 42 (48.3%) |  |
| **Prescribe probiotic food or drinks for most of patients with allergies and/or asthma** |  |  |  |  |  |  |  |  |  |
| No | 97 (82.9%) | 70 (81.4%) |  | 70 (71.4%) | 97 (92.4%) | * | 91 (78.4%) | 76 (87.4%) |  |
| Yes | 20 (17.1%) | 16 (18.6%) |  | 28 (28.6%) | 8 (7.6%) |  | 25 (21.6%) | 11 (12.6%) |  |
| **Forms of probiotics prescribed for patients** |  |  |  |  |  |  |  |  |  |
| Yogurts | 49 (60.5%) | 39 (79.6%) |  | 48 (60.8%) | 40 (78.4%) |  | 59 (67.0%) | 29 (69.0%) |  |
| Naturally fermented products | 10 (12.3%) | 3 (6.1%) |  | 10 (12.7%) | 3 (5.9%) |  | 6 (6.8%) | 7 (16.7%) |  |
| Pharmacy powder | 7 (8.6%) | 4 (8.2%) |  | 9 (11.4%) | 2 (3.9%) |  | 10 (11.4%) | 1 (2.4%) |  |
| Pharmacy tablet | 15 (18.5%) | 3 (6.1%) |  | 12 (15.2%) | 6 (11.8%) |  | 13 (14.8%) | 5 (11.9%) |  |
| **Believe that nutritional advice plays an important role when dealing with allergic or asthmatic children** |  |  |  |  |  |  |  |  |  |
| Strongly agree/agree | 93 (79.5%) | 64 (74.4%) |  | 89 (90.8%) | 68 (64.8%) | * | 96 (82.8%) | 61 (70.1%) | * |
| Strongly disagree/disagree | 5 (4.3%) | 6 (7.0%) |  | 4 (4.1%) | 7 (6.7%) |  | 9 (7.8%) | 2 (2.3%) |  |
| I do not know | 19 (16.2%) | 16 (18.6%) |  | 5 (5.1%) | 30 (28.6%) |  | 11 (9.5%) | 24 (27.6%) |  |
| **Sources of information about dysbiosis** |  |  |  |  |  |  |  |  |  |
| Internet/social media | 21 (30.0%) | 11 (37.9%) |  | 23 (33.8%) | 9 (29.0%) |  | 18 (29.0%) | 14 (37.8%) |  |
| Medical article/Clinical Trial | 32 (45.7%) | 13 (44.8%) |  | 29 (42.6%) | 16 (51.6%) |  | 32 (51.6%) | 13 (35.1%) |  |
| Course instructor | 8 (11.4%) | 1 (3.4%) |  | 9 (13.2%) | 0 (0.0%) |  | 4 (6.5%) | 5 (13.5%) |  |
| A colleague | 6 (8.6%) | 2 (6.9%) |  | 3 (4.4%) | 5 (16.1%) |  | 4 (6.5%) | 4 (10.8%) |  |
| Others | 3 (4.3%) | 2 (6.9%) |  | 4 (5.9%) | 1 (3.2%) |  | 4 (6.5%) | 1. (2.7%) |  |

(*****p<0.05)
